# Supplementary material
Source: Springer Nature journal article supplement (https://www.springermedizin.de/resource/supplementary/12985_2009_626_MOESM1_ESM.pdf/9608136)

## Multiplicity of HPV genotype infection

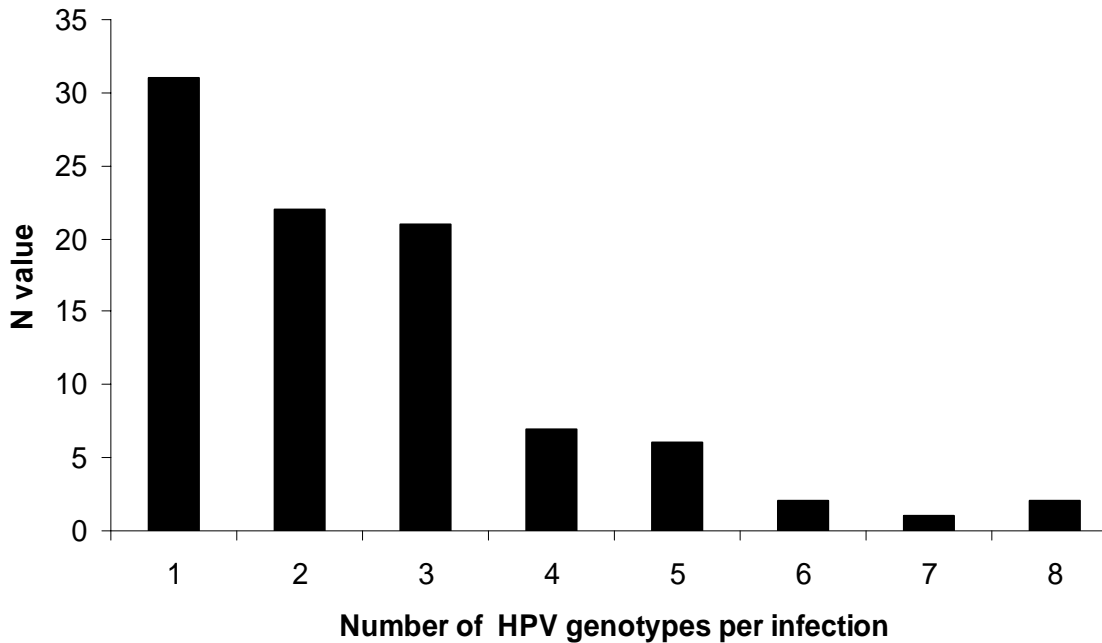

Supplement: MOESM1 [file 9608136]
